# Supplementary material for: Computational Modelling and Simulation of Scaffolds for Bone Tissue Engineering
Source: MDPI journal article supplement (doi:10.3390/computation12040074), 2024-04-04
Supplement: s1 [file s1]

Supplementary Materials

# Computational Modelling and Simulation of Scaffolds for Bone Tissue Engineering

Haja-Sherief N. Musthafa <sup>1,\*</sup>, Jason Walker <sup>2</sup> and Mariusz Domagala <sup>3</sup>

<sup>1</sup> Department of Computer Science, Electrical Engineering and Mathematical Sciences, Western Norway University of Applied Sciences, 5063 Bergen, Norway

<sup>2</sup> Center for Design and Manufacturing Excellence, The Ohio State University, Columbus, OH 43210, USA; walker.1762@osu.edu

<sup>3</sup> Department of Mechanical and Marine Engineering, Western Norway University of Applied Sciences, 5063 Bergen, Norway; mariusz.domagala@hvl.no

\* Correspondence: haja@sherief.no

**Citation:** N. Musthafa, H.-S.; Walker, J.; Domagala, M. Computational Modelling and Simulation of Scaffolds for Bone Tissue Engineering. *Computation* **2024**, *12*, 74. <https://doi.org/10.3390/computation12040074>

Academic Editor: Simeone Marino

Received: 4 March 2024

Revised: 26 March 2024

Accepted: 2 April 2024

Published: 4 April 2024

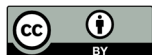

**Copyright:** © 2024 by the authors. Licensee MDPI, Basel, Switzerland. This article is an open access article distributed under the terms and conditions of the Creative Commons Attribution (CC BY) license (<https://creativecommons.org/licenses/by/4.0/>).

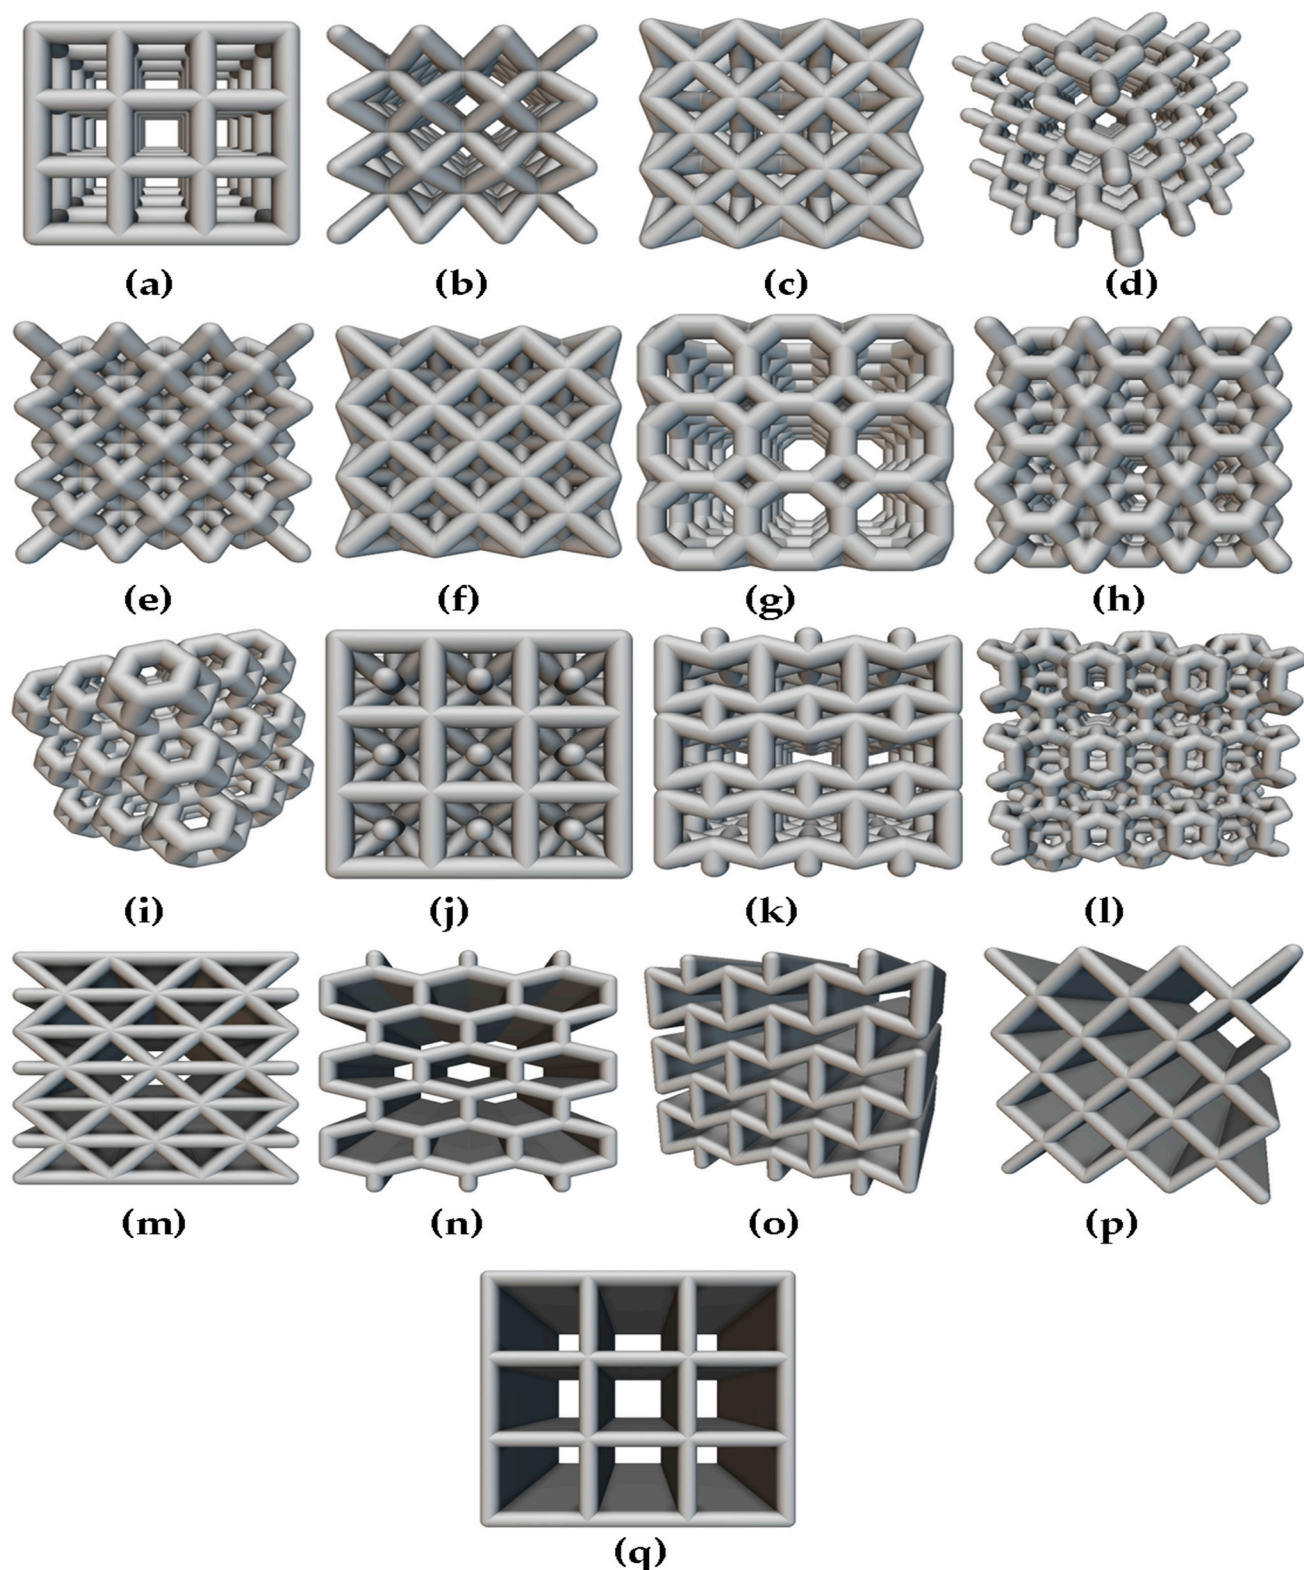

**Figure S1.** Non-Parametric designs of scaffolds : (a) Simple Cubic, (b) Body Centered Cubic (BCC), (c) Face Centered Cubic (FCC), (d) Diamond, (e) Fluorite, (f) Octet, (g) Truncated Cube, (h) Truncated Octahedron, (i) Kelvin Cell, (j) Iso Truss, (k) Re-entrant, (l) Weaire-Phelan, (m) Triangular HoneyComb, (n) Hexagonal HoneyComb, (o) Re-entrant HoneyComb, (p) Square HoneyComb Rotated, and (q) Square HoneyComb.

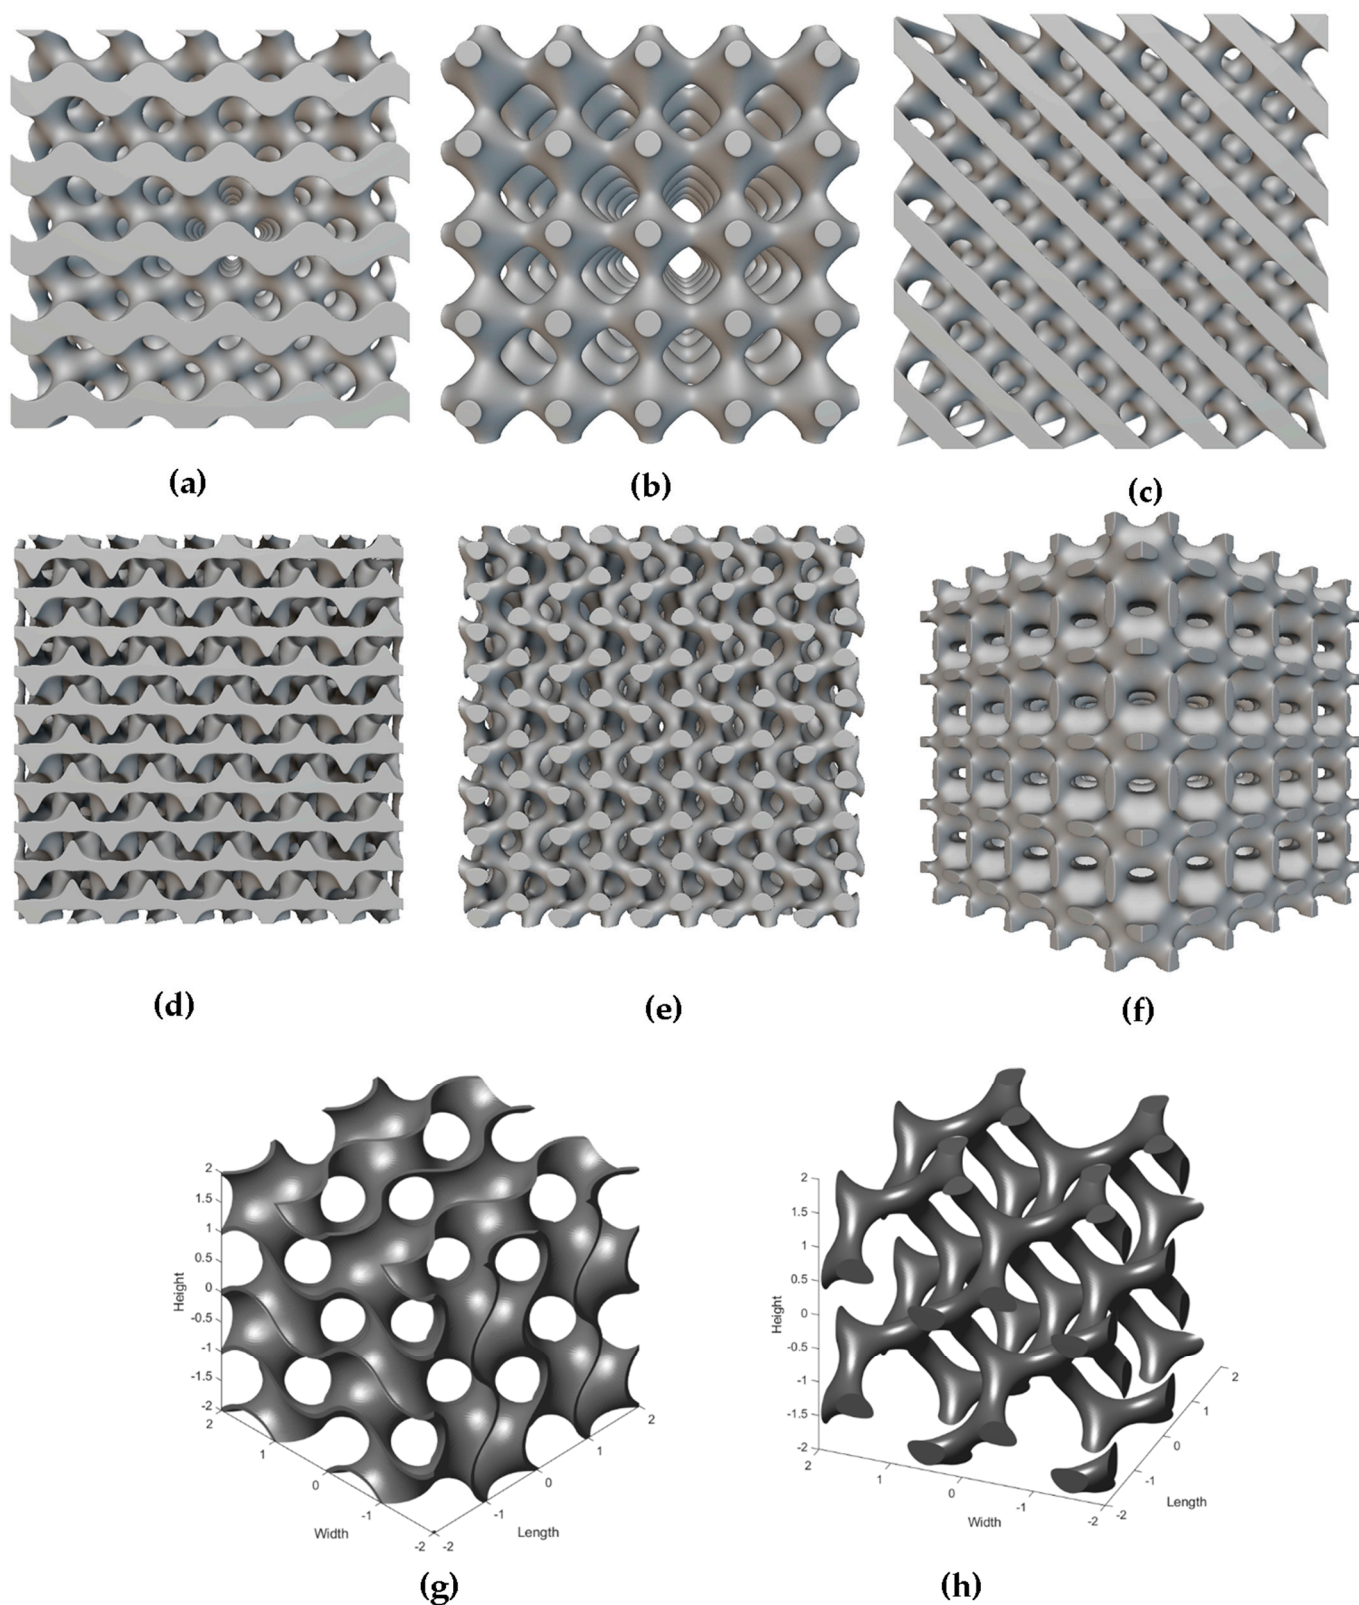

**Figure S2.** Parametric designs of scaffolds - TPMS : (a) Gyroid, (b) Schwarz, (c) Diamond, (d) Lidinoid, (e) Split P, (f) Neovius, (g) Gyroid sheet network and (h) Gyroid solid network.



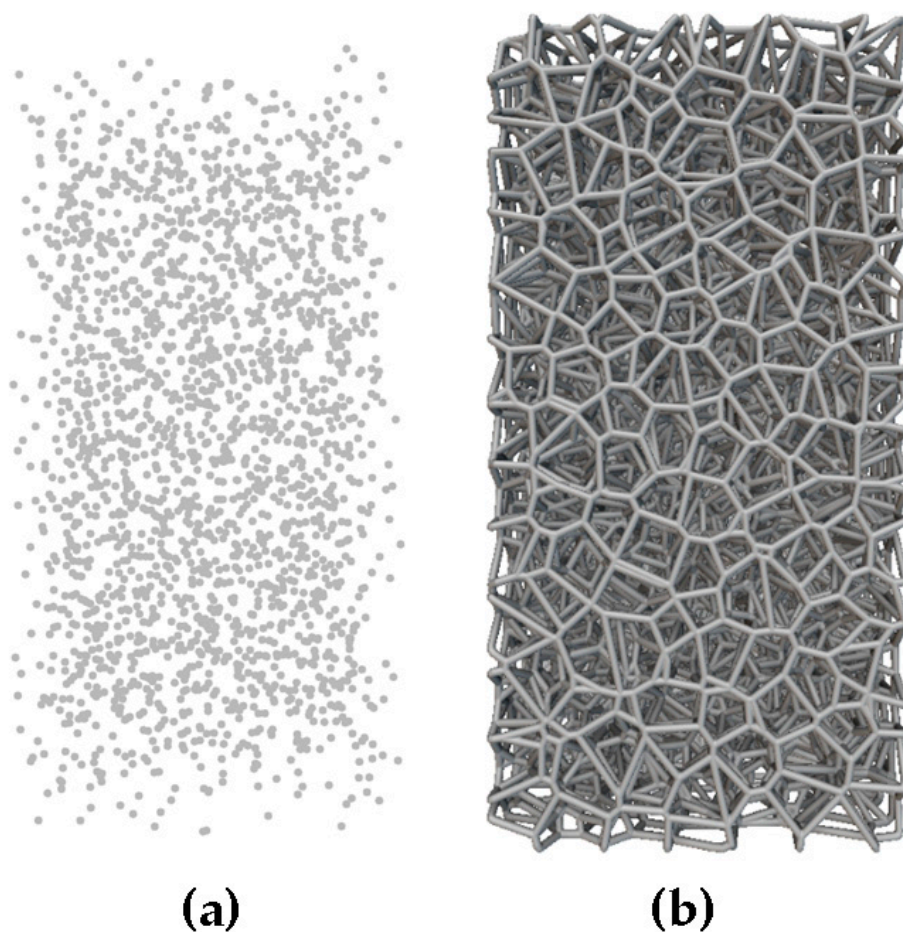

**Figure S3.** Parametric designs of scaffolds - Voronoi : (a) Random seed point within an implicit body and (b) The generated Voronoi lattice

**Table S1.** Software tools to design TPMS/Lattice-based scaffolds.

| Software                            | Link                                                                                                                                                                   |
|-------------------------------------|------------------------------------------------------------------------------------------------------------------------------------------------------------------------|
| 3DXpert                             | <a href="http://www.oqton.com/3dexpert/">www.oqton.com/3dexpert/</a>                                                                                                   |
| Altair OptiStruct                   | <a href="http://www.altair.com/optistruct">www.altair.com/optistruct</a>                                                                                               |
| ASLI<br>(A Simple Lattice Infiller) | <a href="https://www.github.com/tpms-lattice/ASLI">www.github.com/tpms-lattice/ASLI</a>                                                                                |
| <u>AutoDesk</u>                     |                                                                                                                                                                        |
| Netfabb                             | <a href="http://www.autodesk.com/products/netfabb/">www.autodesk.com/products/netfabb/</a>                                                                             |
| Within Medical                      | <a href="http://www.autodesk.com/products/within-medical/">www.autodesk.com/products/within-medical/</a>                                                               |
| Betatype                            | <a href="http://www.voxelmatters.directory/company/betatype/">www.voxelmatters.directory/company/betatype/</a>                                                         |
| CogniCAD                            | <a href="http://www.carbon3d.com/products/cognicad">www.carbon3d.com/products/cognicad</a>                                                                             |
| Geomagic Design X                   | <a href="http://www.oqton.com/geomagic-designx/">www.oqton.com/geomagic-designx/</a>                                                                                   |
| MasMaker                            | <a href="https://www.github.com/CONMAD-CIDESIMX/MaSMaker">www.github.com/CONMAD-CIDESIMX/MaSMaker</a>                                                                  |
| <u>Mathematica Based</u>            | <a href="http://www.wolfram.com/mathematica/">www.wolfram.com/mathematica/</a>                                                                                         |
| RegionTPMS                          | <a href="https://www.github.com/metudust/RegionTPMS">www.github.com/metudust/RegionTPMS</a>                                                                            |
| <u>Matlab Based</u>                 | <a href="http://www.mathworks.com/products/matlab.html">www.mathworks.com/products/matlab.html</a>                                                                     |
| FlattPack                           | <a href="https://www.github.com/ian27ax/FLatt_Pack_dist">www.github.com/ian27ax/FLatt_Pack_dist</a>                                                                    |
| gibbon Code                         | <a href="http://www.gibboncode.org/">www.gibboncode.org/</a>                                                                                                           |
| Lattice Generator                   | <a href="http://www.mathworks.com/matlabcentral/fileexchange/48373-stl-lattice-generator">www.mathworks.com/matlabcentral/fileexchange/48373-stl-lattice-generator</a> |
| Lattice_Karak                       | <a href="https://www.github.com/SoftwareImpacts/SIMPAC-2022-125">www.github.com/SoftwareImpacts/SIMPAC-2022-125</a>                                                    |

|                                            |                                                                                                                                                                                                                                                   |
|--------------------------------------------|---------------------------------------------------------------------------------------------------------------------------------------------------------------------------------------------------------------------------------------------------|
| <b>matGeom</b>                             | <a href="https://www.github.com/mattools/matGeom">www.github.com/mattools/matGeom</a>                                                                                                                                                             |
| <b>Minimal Surfaces Visualisation Code</b> | <a href="https://www.github.com/pttrsnv2/Minimal_Surfaces_Visualization_Code">www.github.com/pttrsnv2/Minimal_Surfaces_Visualization_Code</a>                                                                                                     |
| <b>MiniSurf</b>                            | <a href="https://www.github.com/mengtingh/MiniSurf">www.github.com/mengtingh/MiniSurf</a>                                                                                                                                                         |
| <b>MS Lattice</b>                          | <a href="https://www.github.com/Alistairj43/TPMS-Designer">www.github.com/Alistairj43/TPMS-Designer</a>                                                                                                                                           |
| <b>MS Lattice-PRO</b>                      | <a href="https://www.oraibkhitan.com/mslattice/">www.oraibkhitan.com/mslattice/</a>                                                                                                                                                               |
| <b>scafSLICR</b>                           | <a href="https://www.oraibkhitan.com/latticeit-scaffolds/">www.oraibkhitan.com/latticeit-scaffolds/</a>                                                                                                                                           |
| <b>TPMS Designer</b>                       | <a href="https://www.mathworks.com/matlabcentral/fileexchange/72856-scafslicr">www.mathworks.com/matlabcentral/fileexchange/72856-scafslicr</a>                                                                                                   |
| <b>TPMS Scaffold</b>                       | <a href="https://www.github.com/Alistairj43/TPMS-Designer">www.github.com/Alistairj43/TPMS-Designer</a>                                                                                                                                           |
| <b>Weighted Lattice Generator</b>          | <a href="https://www.mathworks.com/matlabcentral/fileexchange/99379-tpms-scaffold?s_tid=FX_rc2_behav">www.mathworks.com/matlabcentral/fileexchange/99379-tpms-scaffold?s_tid=FX_rc2_behav</a>                                                     |
| <b>MathMod (K3DSurf)</b>                   | <a href="https://www.mathworks.com/matlabcentral/fileexchange/106540-weighted-lattice-generator">www.mathworks.com/matlabcentral/fileexchange/106540-weighted-lattice-generator</a>                                                               |
| <b>Mimics Innovation Suite</b>             | <a href="https://www.sourceforge.net/projects/mathmod/">www.sourceforge.net/projects/mathmod/</a>                                                                                                                                                 |
| <b>PTC Creo</b>                            | <a href="https://www.materialise.com/en/healthcare/mimics-innovation-suite">www.materialise.com/en/healthcare/mimics-innovation-suite</a>                                                                                                         |
| <b>nTopology</b>                           | <a href="https://www.ptc.com/en/products/creo">www.ptc.com/en/products/creo</a>                                                                                                                                                                   |
| <b>Rhino Grasshopper Based</b>             | <a href="https://www.ntop.com">www.ntop.com</a>                                                                                                                                                                                                   |
| <b>Axolotl</b>                             | <a href="https://www.rhino3d.com/">www.rhino3d.com/</a>                                                                                                                                                                                           |
| <b>IntraLattice</b>                        | <a href="https://www.github.com/dbt-ethz/Axolotl/">www.github.com/dbt-ethz/Axolotl/</a>                                                                                                                                                           |
| <b>Crystallon</b>                          | <a href="https://www.intralattice.com/">www.intralattice.com/</a>                                                                                                                                                                                 |
| <b>Monolith</b>                            | <a href="https://www.food4rhino.com/en/app/crystallon">www.food4rhino.com/en/app/crystallon</a>                                                                                                                                                   |
| <b>Maths Models</b>                        | <a href="https://www.food4rhino.com/en/app/monolith">www.food4rhino.com/en/app/monolith</a>                                                                                                                                                       |
| <b>Simpleware</b>                          | <a href="https://www.myminifactory.com/object/3d-print-maths-models-triply-periodic-minimal-surface-structures-mega-pack-73944">www.myminifactory.com/object/3d-print-maths-models-triply-periodic-minimal-surface-structures-mega-pack-73944</a> |
| <b>Sulis Lattice</b>                       | <a href="https://www.synopsys.com/simpleware.html">www.synopsys.com/simpleware.html</a>                                                                                                                                                           |
| <b>Surface Evolver</b>                     | <a href="https://www.gen3d.com/sulis-lattice/">www.gen3d.com/sulis-lattice/</a>                                                                                                                                                                   |
|                                            | <a href="https://www.kenbrakke.com/evolver/evolver.html">www.kenbrakke.com/evolver/evolver.html</a>                                                                                                                                               |

Table S2. List of FEM software

| Software                         | Link                                                                                                                                                              |
|----------------------------------|-------------------------------------------------------------------------------------------------------------------------------------------------------------------|
| <b>Abaqus/CAE</b>                | <a href="https://www.3ds.com/products-services/simulia/products/abacus/abaquscae/">www.3ds.com/products-services/simulia/products/abacus/abaquscae/</a>           |
| <b>ACE+ Suite</b>                | <a href="https://www.myesi.esi-group.com/downloads/software-downloads/ace-suite-2022.0">www.myesi.esi-group.com/downloads/software-downloads/ace-suite-2022.0</a> |
| <b>ADINA Structures</b>          | <a href="https://www.adina.com/adina-structures.shtml">www.adina.com/adina-structures.shtml</a>                                                                   |
| <b>Agros Suite</b>               | <a href="https://www.agros2d.org">www.agros2d.org</a>                                                                                                             |
| <b>Alibre</b>                    | <a href="https://www.alibre.com/">www.alibre.com/</a>                                                                                                             |
| <b>Altair SimLab</b>             | <a href="https://www.altair.com/simlab">www.altair.com/simlab</a>                                                                                                 |
| <b>Altair SimSolid</b>           | <a href="https://www.altair.com/simsolid">www.altair.com/simsolid</a>                                                                                             |
| <b>AMPSol</b>                    | <a href="https://www.ampstech.com/ampstech/Asp/Solvers.asp">www.ampstech.com/ampstech/Asp/Solvers.asp</a>                                                         |
| <b>Ansys Discovery</b>           | <a href="https://www.ansys.com/products/3d-design/ansys-discovery">www.ansys.com/products/3d-design/ansys-discovery</a>                                           |
| <b>Ansys Mechanical</b>          | <a href="https://www.ansys.com/products/structures/ansys-mechanical">www.ansys.com/products/structures/ansys-mechanical</a>                                       |
| <b>Autodesk Inventor/Nastran</b> | <a href="https://www.autodesk.com/solutions/simulation/finite-element-analysis">www.autodesk.com/solutions/simulation/finite-element-analysis</a>                 |
| <b>AutoFEM Analysis</b>          | <a href="https://www.autofem.com">www.autofem.com</a>                                                                                                             |
| <b>CADRE Pro</b>                 | <a href="https://www.cadreanalytic.com/cadrepro6.htm">www.cadreanalytic.com/cadrepro6.htm</a>                                                                     |

|                                             |                                                                                                                                                                                                                                                                                          |
|---------------------------------------------|------------------------------------------------------------------------------------------------------------------------------------------------------------------------------------------------------------------------------------------------------------------------------------------|
| <b>CalculiX</b>                             | <a href="http://www.calculix.de/">www.calculix.de/</a>                                                                                                                                                                                                                                   |
| <b>CAST3M</b>                               | <a href="http://www-cast3m.cea.fr/index.php">www-cast3m.cea.fr/index.php</a>                                                                                                                                                                                                             |
| <b>Code_Aster</b>                           | <a href="http://www.code-aster.org/">www.code-aster.org/</a>                                                                                                                                                                                                                             |
| <b>Comsol - Structural Mechanics Module</b> | <a href="http://www.comsol.com/structural-mechanics-module">www.comsol.com/structural-mechanics-module</a>                                                                                                                                                                               |
| <b>Creo Elements/Direct</b>                 | <a href="http://www.ptc.com/en/products/creo/elements-direct">www.ptc.com/en/products/creo/elements-direct</a>                                                                                                                                                                           |
| <b>deal.II</b>                              | <a href="http://www.dealii.org/">www.dealii.org/</a>                                                                                                                                                                                                                                     |
| <b>DUNE</b>                                 | <a href="http://www.dune-project.org/">www.dune-project.org/</a>                                                                                                                                                                                                                         |
| <b>Elmer FEM</b>                            | <a href="http://www.elmerfem.org/">www.elmerfem.org/</a>                                                                                                                                                                                                                                 |
| <b>Europlexus</b>                           | <a href="http://www-epx.cea.fr">www-epx.cea.fr</a>                                                                                                                                                                                                                                       |
| <b>FEA Tool Multiphysics</b>                | <a href="http://www.featool.com/">www.featool.com/</a>                                                                                                                                                                                                                                   |
| <b>FEAP</b>                                 | <a href="http://www.projects.ce.berkeley.edu/feap/">www.projects.ce.berkeley.edu/feap/</a>                                                                                                                                                                                               |
| <b>FEBio</b>                                | <a href="http://www.febio.org/">www.febio.org/</a>                                                                                                                                                                                                                                       |
| <b>FEM-System MEANS</b>                     | <a href="http://www.fem-infos.com/">www.fem-infos.com/</a>                                                                                                                                                                                                                               |
| <b>FEniCSx</b>                              | <a href="http://www.fenicsproject.org/">www.fenicsproject.org/</a>                                                                                                                                                                                                                       |
| <b>FlexPDE</b>                              | <a href="http://www.pdesolutions.com">www.pdesolutions.com</a>                                                                                                                                                                                                                           |
| <b>FreeCAD - FEM WorkBench</b>              | <a href="http://www.freecad.org/">www.freecad.org/</a> , <a href="http://www.wiki.freecad.org/FEM_Workbench">www.wiki.freecad.org/FEM_Workbench</a>                                                                                                                                      |
| <b>Fusion 360</b>                           | <a href="http://www.autodesk.com/products/fusion-360">www.autodesk.com/products/fusion-360</a>                                                                                                                                                                                           |
| <b>GetDP</b>                                | <a href="http://www.getdp.info">www.getdp.info</a>                                                                                                                                                                                                                                       |
| <b>GetFEM</b>                               | <a href="http://www.getfem.org/">www.getfem.org/</a>                                                                                                                                                                                                                                     |
| <b>GOMA</b>                                 | <a href="http://www.gomafem.com/">www.gomafem.com/</a>                                                                                                                                                                                                                                   |
| <b>Hermes</b>                               | <a href="http://www.hpfem.org">www.hpfem.org</a>                                                                                                                                                                                                                                         |
| <b>Impact</b>                               | <a href="http://www.impact.sourceforge.net">www.impact.sourceforge.net</a>                                                                                                                                                                                                               |
| <b>KRATOS Multiphysics</b>                  | <a href="http://www.github.com/KratosMultiphysics/Kratos">www.github.com/KratosMultiphysics/Kratos</a>                                                                                                                                                                                   |
| <b>LISA - FEA</b>                           | <a href="http://www.lisafea.com/">www.lisafea.com/</a>                                                                                                                                                                                                                                   |
| <b>LUSAS Analyst</b>                        | <a href="http://www.lusas.com/products/analyst.html">www.lusas.com/products/analyst.html</a>                                                                                                                                                                                             |
| <b>Mathematica FEM</b>                      | <a href="http://www.wolfram.com/mathematica/">www.wolfram.com/mathematica/</a> ,<br><a href="http://www.reference.wolfram.com/language/FEMDocumentation/tutorial/FiniteElementOverview.html">www.reference.wolfram.com/language/FEMDocumentation/tutorial/FiniteElementOverview.html</a> |
| <b>MAT-fem</b>                              | <a href="http://www.cimne.com/mat-fem/">www.cimne.com/mat-fem/</a>                                                                                                                                                                                                                       |
| <b>Matlab FEA</b>                           | <a href="http://www.mathworks.com/discovery/finite-element-analysis.html">www.mathworks.com/discovery/finite-element-analysis.html</a>                                                                                                                                                   |
| <b>Mecway FEA</b>                           | <a href="http://www.mecway.com">www.mecway.com</a>                                                                                                                                                                                                                                       |
| <b>midas NFX</b>                            | <a href="http://www.nfx.midasuser.com/nfx">www.nfx.midasuser.com/nfx</a>                                                                                                                                                                                                                 |
| <b>MFEM</b>                                 | <a href="http://www.mfem.org/">www.mfem.org/</a>                                                                                                                                                                                                                                         |
| <b>MOFEM</b>                                | <a href="http://www.mofem.eng.gla.ac.uk/">www.mofem.eng.gla.ac.uk/</a>                                                                                                                                                                                                                   |
| <b>MOOSE</b>                                | <a href="http://www.mooseframework.inl.gov/">www.mooseframework.inl.gov/</a>                                                                                                                                                                                                             |
| <b>MORFEO</b>                               | <a href="http://www.altair.com/morfeo">www.altair.com/morfeo</a>                                                                                                                                                                                                                         |
| <b>MSC Nastran / Patran</b>                 | <a href="http://www.hexagon.com/products/product-groups/computer-aided-engineering-software/msc-nastran">www.hexagon.com/products/product-groups/computer-aided-engineering-software/msc-nastran</a>                                                                                     |

|                                  |                                                                                                                                                              |
|----------------------------------|--------------------------------------------------------------------------------------------------------------------------------------------------------------|
| <b>NISA II</b>                   | <a href="http://www.nisasoftware.com/software/nisa-mechanical/nisa-ii">www.nisasoftware.com/software/nisa-mechanical/nisa-ii</a>                             |
| <b>Static/Dynamic</b>            |                                                                                                                                                              |
| <b>NOGRID</b>                    | <a href="http://www.nogrid.com/">www.nogrid.com/</a>                                                                                                         |
| <b>nTopology</b>                 | <a href="http://www.ntop.com/">www.ntop.com/</a>                                                                                                             |
| <b>OOFEM</b>                     | <a href="http://www.oofem.org/">www.oofem.org/</a>                                                                                                           |
| <b>PERMAS</b>                    | <a href="http://www.intes.de/k_permas">www.intes.de/k_permas</a>                                                                                             |
| <b>PrePoMax</b>                  | <a href="http://www.prepomax.fs.um.si">www.prepomax.fs.um.si</a>                                                                                             |
| <b>Range</b>                     | <a href="http://www.range-software.com/">www.range-software.com/</a>                                                                                         |
| <b>QuickField</b>                | <a href="http://www.quickfield.com/">www.quickfield.com/</a>                                                                                                 |
| <b>Siemens</b>                   | <a href="http://www.solidedge.siemens.com/en/">www.solidedge.siemens.com/en/</a>                                                                             |
| <b>SolidEdge</b>                 |                                                                                                                                                              |
| <b>Sim4Design</b>                | <a href="http://www.sim4design.com">www.sim4design.com</a>                                                                                                   |
| <b>Simcenter</b>                 | <a href="http://www.plm.sw.siemens.com/en-US/simcenter/mechanical-simulation/femap/">www.plm.sw.siemens.com/en-US/simcenter/mechanical-simulation/femap/</a> |
| <b>Femap</b>                     |                                                                                                                                                              |
| <b>Simscale</b>                  |                                                                                                                                                              |
| <b>(Structural Mechanics)</b>    | <a href="http://www.simscale.com/product/structural-mechanics/">www.simscale.com/product/structural-mechanics/</a>                                           |
| <b>SimWise 4D</b>                | <a href="http://www.design-simulation.com/simwise4d">www.design-simulation.com/simwise4d</a>                                                                 |
| <b>SfePy</b>                     | <a href="http://www.sfepy.org">www.sfepy.org</a>                                                                                                             |
| <b>Solidworks FEA simulation</b> | <a href="http://www.solidworks.com/product/solidworks-simulation">www.solidworks.com/product/solidworks-simulation</a>                                       |
| <b>Solvias</b>                   | <a href="http://www.solvias.eu">www.solvias.eu</a>                                                                                                           |
| <b>Strand7</b>                   | <a href="http://www.strand7.com">www.strand7.com</a>                                                                                                         |
| <b>StressCheck</b>               | <a href="http://www.esrd.com/products/stresscheck-professional/">www.esrd.com/products/stresscheck-professional/</a>                                         |
| <b>SU<sup>2</sup></b>            | <a href="http://www.su2code.github.io/">www.su2code.github.io/</a>                                                                                           |
| <b>Visual FEA</b>                | <a href="http://www.visualfea.com/">www.visualfea.com/</a>                                                                                                   |
| <b>WELSIM</b>                    | <a href="http://www.welsim.com/">www.welsim.com/</a>                                                                                                         |
| <b>Z88/Z88 Aurora</b>            | <a href="http://www.en.z88.de/">www.en.z88.de/</a>                                                                                                           |
| <b>Zebulon</b>                   | <a href="http://www.zset-software.com/products/zebulon/">www.zset-software.com/products/zebulon/</a>                                                         |

Table S3. List of CFD software

| Software                | Link                                                                                                                                                             |
|-------------------------|------------------------------------------------------------------------------------------------------------------------------------------------------------------|
| <b>ACE+ Suite</b>       | <a href="http://www.myesi.esi-group.com/downloads/software-downloads/ace-suite-2021.0">www.myesi.esi-group.com/downloads/software-downloads/ace-suite-2021.0</a> |
| <b>ADINA CFD</b>        | <a href="http://www.adina.com/adina-cfd.shtml">www.adina.com/adina-cfd.shtml</a>                                                                                 |
| <b>AIRSHAPER</b>        | <a href="http://www.airshaper.com/">www.airshaper.com/</a>                                                                                                       |
| <b>Altair CFD</b>       | <a href="http://www.altair.com/altair-cfd">www.altair.com/altair-cfd</a>                                                                                         |
| <b>Ansys Discovery</b>  | <a href="http://www.ansys.com/products/3d-design/ansys-discovery">www.ansys.com/products/3d-design/ansys-discovery</a>                                           |
| <b>Ansys Fluent/CFX</b> | <a href="http://www.ansys.com/products/fluids">www.ansys.com/products/fluids</a>                                                                                 |
| <b>Agros Suite</b>      | <a href="http://www.agros2d.org">www.agros2d.org</a>                                                                                                             |
| <b>Autodesk CFD</b>     | <a href="http://www.autodesk.com/products/cfd/">www.autodesk.com/products/cfd/</a>                                                                               |
| <b>Basilisk</b>         | <a href="http://www.basilisk.fr">www.basilisk.fr</a>                                                                                                             |
| <b>Bramble</b>          | <a href="http://www.bramblecf.com">www.bramblecf.com</a>                                                                                                         |
| <b>CADRE Flow</b>       | <a href="http://www.cadreanalytic.com/cadreflo.htm">www.cadreanalytic.com/cadreflo.htm</a>                                                                       |
| <b>CaNS</b>             | <a href="http://www.github.com/CaNS-World/CaNS">www.github.com/CaNS-World/CaNS</a>                                                                               |

|                                                    |                                                                                                                                                                                                              |
|----------------------------------------------------|--------------------------------------------------------------------------------------------------------------------------------------------------------------------------------------------------------------|
| <b>CAST3M</b>                                      | <a href="http://www-cast3m.cea.fr/index.php">www-cast3m.cea.fr/index.php</a>                                                                                                                                 |
| <b>CFDTool</b>                                     | <a href="http://www.cfdtool.com/">www.cfdtool.com/</a>                                                                                                                                                       |
| <b>Channelflow</b>                                 | <a href="http://www.channelflow.ch">www.channelflow.ch</a>                                                                                                                                                   |
| <b>Comsol - CFD Module</b>                         | <a href="http://www.comsol.com/cfd-module">www.comsol.com/cfd-module</a>                                                                                                                                     |
| <b>Converge CFD</b>                                | <a href="http://www.convergecd.com/">www.convergecd.com/</a>                                                                                                                                                 |
| <b>COOLFluiD</b>                                   | <a href="https://www.github.com/andrealani/COOLFluiD">www.github.com/andrealani/COOLFluiD</a>                                                                                                                |
| <b>Cradle CFD</b>                                  | <a href="http://www.cradle-cfd.com/">www.cradle-cfd.com/</a>                                                                                                                                                 |
| <b>dicehub</b>                                     | <a href="http://www.dicehub.com/">www.dicehub.com/</a>                                                                                                                                                       |
| <b>Dolfyn</b>                                      | <a href="http://www.dolfyn.net/">www.dolfyn.net/</a>                                                                                                                                                         |
| <b>Elmer</b>                                       | <a href="http://www.elmerfem.org">www.elmerfem.org</a>                                                                                                                                                       |
| <b>FEBio</b>                                       | <a href="http://www.febio.org/">www.febio.org/</a>                                                                                                                                                           |
| <b>FEniCSx</b>                                     | <a href="http://www.fenicsproject.org">www.fenicsproject.org</a>                                                                                                                                             |
| <b>Fidelity CFD</b>                                | <a href="http://www.cadence.com/en_US/home/tools/system-analysis/computational-fluid-dynamics/fidelity.html">www.cadence.com/en_US/home/tools/system-analysis/computational-fluid-dynamics/fidelity.html</a> |
| <b>FlexPDE</b>                                     | <a href="http://www.pdesolutions.com">www.pdesolutions.com</a>                                                                                                                                               |
| <b>Flow - 3D</b>                                   | <a href="http://www.flow3d.com/products/flow-3d/">www.flow3d.com/products/flow-3d/</a>                                                                                                                       |
| <b>FlowVision</b>                                  | <a href="http://www.flowvisioncfd.com/">www.flowvisioncfd.com/</a>                                                                                                                                           |
| <b>FLUBIO</b>                                      | <a href="http://www.flubiopetsc.github.io/flubiopetsc">www.flubiopetsc.github.io/flubiopetsc</a>                                                                                                             |
| <b>FluidDyn</b>                                    | <a href="http://www.fluiddyn.netlify.app">www.fluiddyn.netlify.app</a>                                                                                                                                       |
| <b>FreeFEM</b>                                     | <a href="http://www.freefem.org/">www.freefem.org/</a>                                                                                                                                                       |
| <b>FreeCAD - CfdOF Module (CFD OpenFoam)</b>       | <a href="https://www.github.com/jaheyns/CfdOF">www.github.com/jaheyns/CfdOF</a> , <a href="http://www.freecad.org/">www.freecad.org/</a>                                                                     |
| <b>Hermes</b>                                      | <a href="http://www.hpfem.org">www.hpfem.org</a>                                                                                                                                                             |
| <b>HiFlow<sup>3</sup></b>                          | <a href="http://www.hiflow3.org">www.hiflow3.org</a>                                                                                                                                                         |
| <b>IBAMR</b>                                       | <a href="http://www.ibamr.github.io">www.ibamr.github.io</a>                                                                                                                                                 |
| <b>KRATOS Multiphysics</b>                         | <a href="https://www.github.com/KratosMultiphysics/Kratos">www.github.com/KratosMultiphysics/Kratos</a>                                                                                                      |
| <b>LS - DYNA</b>                                   | <a href="http://www.ansys.com/products/structures/ansys-ls-dyna">www.ansys.com/products/structures/ansys-ls-dyna</a>                                                                                         |
| <b>MFC</b>                                         | <a href="http://www.mflowcode.github.io">www.mflowcode.github.io</a>                                                                                                                                         |
| <b>MFIX</b>                                        | <a href="http://www.mfix.netl.doe.gov/products/mfix/">www.mfix.netl.doe.gov/products/mfix/</a>                                                                                                               |
| <b>M-Star</b>                                      | <a href="http://www.mstarcfd.com">www.mstarcfd.com</a>                                                                                                                                                       |
| <b>NEK</b>                                         | <a href="http://www.nek5000.mcs.anl.gov">www.nek5000.mcs.anl.gov</a>                                                                                                                                         |
| <b>NEKO</b>                                        | <a href="https://www.github.com/ExtremeFLOW/neko">www.github.com/ExtremeFLOW/neko</a>                                                                                                                        |
| <b>NEKTAR++</b>                                    | <a href="http://www.nektar.info">www.nektar.info</a>                                                                                                                                                         |
| <b>NISA 3D-FLUID</b>                               | <a href="http://www.nisasoftware.com/software/nisa-mechanical/3d-fluid">www.nisasoftware.com/software/nisa-mechanical/3d-fluid</a>                                                                           |
| <b>NOGRID</b>                                      | <a href="http://www.nogrid.com/">www.nogrid.com/</a>                                                                                                                                                         |
| <b>Omnis/LB</b>                                    | <a href="http://www.numeca.de/en/products-omnis-platform/">www.numeca.de/en/products-omnis-platform/</a>                                                                                                     |
| <b>OneFLOW</b>                                     | <a href="https://www.github.com/eric2003/OneFLOW">www.github.com/eric2003/OneFLOW</a>                                                                                                                        |
| <b>OpenFOAM</b>                                    | <a href="http://www.openfoam.com/">www.openfoam.com/</a>                                                                                                                                                     |
| <b>OpenFVM</b>                                     | <a href="http://www.openfvm.sourceforge.net">www.openfvm.sourceforge.net</a>                                                                                                                                 |
| <b>OpenLB</b>                                      | <a href="http://www.openlb.net">www.openlb.net</a>                                                                                                                                                           |
| <b>Palabos (Parallel Lattice Boltzmann Solver)</b> | <a href="https://www.gitlab.com/unigehpfs/palabos">www.gitlab.com/unigehpfs/palabos</a>                                                                                                                      |
| <b>PETSc-FEM</b>                                   | <a href="http://www.cimec.org.ar/foswiki/Main/Cimec/PETScFEM">www.cimec.org.ar/foswiki/Main/Cimec/PETScFEM</a>                                                                                               |
| <b>POWERFLOW</b>                                   | <a href="http://www.3ds.com/products-services/simulia/products/powerflow/">www.3ds.com/products-services/simulia/products/powerflow/</a>                                                                     |
| <b>Pyfr</b>                                        | <a href="http://www.pyfr.org">www.pyfr.org</a>                                                                                                                                                               |
| <b>Rheolef</b>                                     | <a href="http://www.membres-ljk.imag.fr/Pierre.Saramito/rheolef">www.membres-ljk.imag.fr/Pierre.Saramito/rheolef</a>                                                                                         |
| <b>QuickerSIM CFD</b>                              | <a href="http://www.old.quickersim.com/cfdtoolbox/">www.old.quickersim.com/cfdtoolbox/</a>                                                                                                                   |



|                                   |                                                                                                                                                                            |
|-----------------------------------|----------------------------------------------------------------------------------------------------------------------------------------------------------------------------|
| <b>Range</b>                      | <a href="http://www.range-software.com/">www.range-software.com/</a> , <a href="https://www.github.com/Range-Software/range3">www.github.com/Range-Software/range3</a>     |
| <b>RhinoCFD</b>                   | <a href="http://www.cham.co.uk/rhinoCFD.php">www.cham.co.uk/rhinoCFD.php</a>                                                                                               |
| <b>Salome CFD</b>                 | <a href="http://www.salome-platform.org/">www.salome-platform.org/</a>                                                                                                     |
| <b>scFLOW</b>                     | <a href="http://www.cradle-cfd.com/product/scflow.html">www.cradle-cfd.com/product/scflow.html</a>                                                                         |
| <b>SC/Tetra</b>                   | <a href="http://www.cradle-cfd.com/product/sctetra.html">www.cradle-cfd.com/product/sctetra.html</a>                                                                       |
| <b>SEAMPLEX</b>                   | <a href="http://www.seamplex.com">www.seamplex.com</a>                                                                                                                     |
| <b>SEMTEX</b>                     | <a href="https://www.gitlab.com/semtex-base/semtex">www.gitlab.com/semtex-base/semtex</a>                                                                                  |
| <b>Simcenter FLOEFD</b>           | <a href="http://www.plm.sw.siemens.com/en-US/simcenter/fluids-thermal-simulation/floefd/">www.plm.sw.siemens.com/en-US/simcenter/fluids-thermal-simulation/floefd/</a>     |
| <b>Simcenter STAR-CCM+</b>        | <a href="http://www.plm.sw.siemens.com/en-US/simcenter/fluids-thermal-simulation/star-ccm/">www.plm.sw.siemens.com/en-US/simcenter/fluids-thermal-simulation/star-ccm/</a> |
| <b>SimFlow</b>                    | <a href="http://www.sim-flow.com/">www.sim-flow.com/</a>                                                                                                                   |
| <b>Simscale CFD</b>               | <a href="http://www.simscale.com/product/cfd/">www.simscale.com/product/cfd/</a>                                                                                           |
| <b>SimWorks</b>                   | <a href="http://www.idealsimulations.com/simworks-free-cfd-software/">www.idealsimulations.com/simworks-free-cfd-software/</a>                                             |
| <b>Solidworks flow simulation</b> | <a href="http://www.solidworks.com/product/solidworks-flow-simulation">www.solidworks.com/product/solidworks-flow-simulation</a>                                           |
| <b>Symscape</b>                   | <a href="http://www.symscape.com/">www.symscape.com/</a>                                                                                                                   |
| <b>SU<sup>2</sup></b>             | <a href="https://www.su2code.github.io/">www.su2code.github.io/</a>                                                                                                        |
| <b>TCLB</b>                       | <a href="https://www.github.com/CFD-GO/TCLB">www,github.com/CFD-GO/TCLB</a>                                                                                                |
| <b>Visual CFD</b>                 | <a href="http://www.esi.com.au/software/visualcfd/">www.esi.com.au/software/visualcfd/</a>                                                                                 |
| <b>XFLOW</b>                      | <a href="http://www.3ds.com/products-services/simulia/products/xflow/">www.3ds.com/products-services/simulia/products/xflow/</a>                                           |
